# Supplementary material for: Gas chromatography-mass spectrometry and Fourier-transform infrared spectroscopy coupled to chemometrics for metabolome analysis of different milk types in the light of green analytical chemistry
Source: PeerJ. 2025 Sep 17;13:e19921. doi: 10.7717/peerj.19921 (PMC12449862; doi:10.7717/peerj.19921)
Supplement: Supplemental Information 10 [file peerj-13-19921-s010.xlsx]

## Sheet: milk matrix
Alignment ID	Average Rt(min)	Average RI	Metabolite name	Chemical class	BM1-a	BM1-b	BM1-c	BM2-a	BM2-b	BM2-c	CM1-a	CM1-b	CM1-c	CM2-a	CM2-b	CM2-c	GM-a	GM-b	GM-c	LM-a	LM-b	LM-c
1	7.063	1076.7	Glycolic acid, TMS ester	Organic acid	1656.12	5804.5	3730.31	2504.12	1636	2923.38	2692.81	2793.88	1867	1414.5	1926.62	3012.88	1693.38	2937.25	2389.31	1914.88	2042.94	1293.12
2	7.106	1080.58	Valine, TMS ester	Amino acid/nitrogenous	958.75	1636.69	1297.72	1252.88	1295.12	1226.19	1066.88	1281.88	1482	1027.31	1418.5	966.812	1003.56	1387.38	1367.31	1095	1459.69	1185.5
3	7.264	1094.75	Pyruvic acid, enol di TMS	Organic acid	11233.6	30006.9	20620.3	5659.38	4198.19	7962.56	11474.1	12574.8	7344.25	7246.94	15751.2	25457.3	1074.75	2237.38	2302.88	10443.3	13029.4	11993.8
4	7.543	1112.38	Oxalic acid, di TMS ester	Organic acid	129469	395858	262664	85266.4	172067	268639	188844	144592	45148.6	107127	127553	216570	41786.8	242181	158244	152297	68603.8	43484.3
5	8.01	1138.56	Methyl malonic acid, di TMS	Organic acid	16119.8	48047.1	32083.4	11224.6	20515.9	34858.4	25013.1	22802.4	7527.25	11880	15623.6	37599.1	7779.31	27489.3	21789.5	16752.5	9036.31	6445.81
6	8.046	1140.52	N-acetyl glycine TMS	Amino acid/nitrogenous	13606.9	32307.5	22957.2	15947.8	16484	25191	17917.1	18750.4	10581.5	11622.4	12408.6	39711.8	10789.7	22216.3	16254.4	14323.9	10902.1	10204.9
7	8.141	1145.67	Oxalic acid, di TMS ester	Organic acid	1336	2033.5	1684.75	1445.62	1256.06	1465.06	1056.81	1368.5	1074.31	1015.44	1414.25	1830.81	901.25	1384.88	1343.69	1151.12	1434.19	1169.5
8	8.204	1149.42	L-Pyroglutamic acid, methyl ester	Amino acid/nitrogenous	1174.06	1766.38	1470.22	924.375	1270.94	1083.06	714.812	1404.31	819.938	1100.81	937.625	1250.38	910.812	1494.81	1473.38	1204	888.5	1303
9	8.336	1157.2	Benzyl alcohol, TMS	Alcohol	580.062	702.562	641.312	711.5	632.188	527.188	151.125	862.375	804.812	671.438	824.812	135.25	226.375	147.938	934.312	378.438	171.062	518.625
10	8.397	1160.19	L-Leucine, TMS ester	Amino acid/nitrogenous	908.75	1388.69	1148.72	722.438	986.125	825.438	507.812	1181	726.75	886.125	762.375	986	835	1232	1043.94	896.562	684.938	933.812
11	8.525	1167.36	3-Hydroxy butanoic acid, di TMS	Organic acid	6940.56	9468.81	8204.69	2805.94	2248.81	3073.06	17829.9	4120.88	2728.19	2692.69	13684.1	41617.6	1956.5	5520.06	2822.81	731.812	774.812	161.125
12	8.739	1179.36	Valine, di TMS	Amino acid/nitrogenous	105074	347917	226495	138141	136551	262409	201430	147524	66358	76305	75261.7	565183	77317.8	256339	123939	90239	56457	42439.9
13	9.469	1223.54	Succinic acid, di TMS	Organic acid	19753.2	42851.2	31302.2	22916.5	22231.5	31775.8	23441.9	24412.9	15267.8	16463.8	16775.4	53949.7	17628.7	31670.7	22944.9	21290.2	16281.1	17254.8
14	9.723	1240.06	Ethanol amine, N, N-di TMS-, TMS ether	Amino acid/nitrogenous	94155.6	141275	117715	116217	91727.2	114313	78437.2	115939	115258	90867.9	111632	130420	83365.8	100696	121614	103312	114519	116629
15	9.877	1250.1	Urea, di TMS	Amino acid/nitrogenous	288423	314155	301289	244301	236625	284586	205820	285793	200631	167489	213862	488813	84043.3	323948	166376	266126	321720	312724
16	10.169	1268.7	Caprylic acid TMS ester	Organic acid	2135.44	2864.19	2499.81	1840.62	1439.75	2074.62	1065	1642.75	1154.94	945.188	1269.5	2212	1022.94	1061.56	1181	1357.62	1533.69	1234.25
17	10.193	1270.61	Glycolaldehyde dimer, di TMS ether	Sugar	1149.19	1110.31	1129.75	1413.12	1495	783.188	1015	1977.38	2063	1584.38	1811.12	1759.5	1093	1466.94	2449.25	1081.88	1369.31	1201.69
18	10.259	1274.98	Ethanol amine, N, N-di TMS-, TMS ether	Amino acid/nitrogenous	5848.94	5698.5	5773.72	21611	20020.9	17322.4	947.312	9054.5	6100.75	6324	1038.31	3395.94	11195.6	34555.4	21527.1	41777.3	49785.4	43284.8
19	10.368	1281.58	Unknown hydrocarbon	Hydrocarbon	823.062	2908.12	1865.59	586.688	451.062	1401.06	616.438	6292.44	724	331.188	1778.38	1042.25	697.25	414.812	1090.38	748.875	1597.69	769.812
20	10.423	1285.29	Glycerol, tri TMS	Alcohol	51908	137525	94716.3	43710.1	27944.8	111622	99731.1	34731.9	33920.6	41441.6	83475.9	194181	18827.6	41930.3	26894.1	34443.6	33708.1	26584.2
21	10.453	1287.57	Phosphoric acid, tri TMS	Inorganic acid	404146	667460	535803	650136	639406	846750	3792.75	778582	565052	4706.94	550802	1168380	814.812	389584	187242	2239	406532	368299
22	10.565	1295.19	Nicotinic acid TMS (vitamin B3 or niacin)	Vitamin	129.625	403.188	266.406	135.125	174.625	154	204.25	325.375	211.438	204.375	525.438	80.5	130.438	166.5	177.875	282.375	124.062	121.875
23	10.891	1316.08	Glycine, tri TMS	Amino acid/nitrogenous	31972.8	32451.2	32212	32186.8	29648.1	30379.8	3027.19	18075.9	10902.1	11479.8	3499.69	6579.44	2332	7665.62	4788.81	14610.1	19869.6	16130.9
24	10.968	1321.08	Succinic acid, di TMS	Organic acid	14286.1	17911.2	16098.7	10989.9	9707.62	12352.1	22350	9630.38	6166	6181.44	15798.6	57316.1	9398.44	35994.6	13306.9	84065.4	103203	86275.9
25	11.289	1341.98	Glyceric acid, tri TMS	Organic acid	2510.88	3029.31	2770.09	9200.75	8660.75	10044.6	4465.06	1996.94	1320	1424.5	3287.81	10228.3	1493.88	4802.56	2081.81	612.875	341.562	282.812
26	11.438	1351.97	Fumaric acid, di TMS	Organic acid	595.25	823.5	709.375	1497.62	1112.44	1706.56	507.188	1063.38	695.75	636.562	402	1097.94	1355.62	5096.19	2445.5	409.5	345.375	380.562
27	11.576	1360.67	Nonanoic acid, TMS ester	Organic acid	125366	144956	135161	126455	127472	136133	117164	139134	126438	123563	122620	168248	128784	134205	132918	143855	132031	130415
28	12.296	1408.49	Methyl succinic acid, di TMS	Organic acid	947.375	1697.19	1322.28	1406	1013.75	1181.38	847.812	1280.88	1427.56	951.312	1392.38	1313.94	746.062	1297.19	1181.56	902.688	1276.94	1067.31
29	12.597	1430.83	Aspartic acid, di TMS ester	Amino acid/nitrogenous	540	769.562	654.781	222.562	246.375	314.062	178.562	243.25	170.75	213.438	174.062	127.062	161.312	142.875	196.562	177.375	179.625	196.062
30	12.969	1459.48	Capric acid, TMS ester	Fatty acid	1762.94	1694.19	1728.56	665.062	639.375	818.438	875.375	563.438	272.312	351.312	855.312	1986.5	407.375	706.375	527.438	350.375	374	302.188
31	13.308	1485.11	Aspartic acid, N-TMS-, di TMS ester	Amino acid/nitrogenous	951.125	1824.06	1387.59	998.188	882.625	964.375	771.062	991.812	731.562	543.5	918.938	1442	615.062	822.5	798	911.312	1620.75	1278.5
32	13.393	1491.36	Threose, tri TMS ether methyl oxime	Sugar	1150.44	1175.5	1162.97	1000.38	911	801.25	1137.81	733.375	516.562	585.062	558.812	1928.06	832.562	2135.19	1008.5	2411.25	2713.94	2466.56
33	13.506	1499.76	Malic acid, tri TMS	Organic acid	3030.38	3796.69	3413.53	15642.9	13834.8	18097.3	3534.81	3843.12	2263.62	2520.19	1559.12	4001.25	16632.4	48444.6	21802.8	815.875	1403.94	1092.25
34	13.737	1517.31	Erythritol, tetra TMS	Sugar alcohol	7852	9094.56	8473.28	8600.56	8361.44	8982.25	6835.69	8686.75	7357.25	7255.38	7430.25	10297.1	8126.75	8681.19	8182.12	8454.31	7895.5	7498.75
35	13.992	1536.5	Pyroglutamic acid, di TMS	Amino acid/nitrogenous	13938.4	15520.5	14729.4	8715.81	6897.06	11349.8	1716.75	5242.19	2546	2349.56	1896.56	5579.25	626.75	2810.31	1785	3860.69	5506.12	4028.69
36	14.606	1582.74	2-Hydroxyglutaric acid, tri TMS	Organic acid	2961.06	3388.88	3174.97	1916.94	1712.62	2349.5	5606.5	2914.31	1691.19	1682.25	4217.12	15370.4	901.188	2634.94	1275.69	677.188	815.125	737
37	15.002	1614.2	2-ketoglutaric acid, tri TMS	Organic acid	14370.9	13276.4	13823.7	9399.62	8675.12	9578.38	12418.9	10616.7	5507.06	6918.19	9791.06	28951.1	9659.06	21913.2	12700.4	4010.06	4957	4519.06
38	15.16	1627.58	Glutamic acid, tri TMS	Amino acid/nitrogenous	3246.88	4975.94	4111.41	2274.38	1131.25	1318.69	152.188	1042.44	1035.31	279.438	352.312	352	143.812	245.688	242.062	661.312	2879.81	1719
39	15.221	1632.6	Arabinose, 2,3,4,5-tetra-O-TMS	Sugar	718.688	1842.75	1280.72	1287.5	908.125	426.062	158.375	1615.94	2651.75	2167.62	749.062	828.062	1032.81	219.312	3069.31	532.062	699.875	1084.12
40	15.46	1652.86	Lauric acid, TMS ester	Fatty acid	2484.12	2306.88	2395.5	1216.94	945.312	1085.81	2383.38	968.5	600.125	508.812	1537.31	4763.38	827.125	1723.94	833.25	770.062	553.938	513.875
41	15.628	1667.25	Ribose, tetra TMS	Sugar	1436.62	2371.25	1903.94	1710.69	1530.81	2296.56	3022.12	1884.62	1452.56	1090.56	3352.31	9143.31	1098	3332.94	2127.44	736.188	1067.62	996.438
42	15.816	1683.08	Arabinose, tetra-O-TMS	Sugar	1065.25	1363	1214.12	1316.25	1333.62	1867.81	2594.44	1723.56	1075.31	840.125	2728.75	8741	783.875	2236.62	2021.75	725.75	784.812	1058
43	15.902	1690.41	Rhamnose, tetra TMS	Sugar	3556.25	4525.81	4041.03	4142.75	3788.81	5050.44	12042.2	3425	2361.69	2636.81	9420.62	27787.4	9957.69	30662	15379	1303.56	1420.12	1270.75
44	16.386	1731.29	Rhamnose, tetra TMS	Sugar	7321.06	7724.38	7522.72	8252.69	8093.69	10076.4	22114.2	6902.19	4365.62	4692.56	16681.8	53527.1	18779.9	61666.8	27289.8	2142.44	2569.38	2331.31
45	16.466	1738.15	Arabinitol, penta-O-TMS	Sugar alcohol	2711	3026.94	2868.97	3731.62	3732.5	4341.31	4575.75	2143.44	1405.75	1216.81	3477.12	9604.38	1116.38	4139	1788.06	679	1184	1085.75
46	16.519	1742.6	Ribitol, penta TMS	Sugar alcohol	466.812	708.375	587.594	411.562	412.688	619.375	449.812	530.562	189	195.312	409	1006.81	251.938	804.062	396.625	766.75	1113.94	880.25
47	16.687	1756.97	Cis-Aconitic acid, tri TMS	Organic acid	916.25	879.938	898.094	860.25	834.25	972.812	1628.12	1067	672.625	690.812	1302.75	4808.19	470.125	1312.75	640.75	152.312	819.938	208.5
48	16.696	1757.64	Orotic acid, tri TMS	Amino acid/nitrogenous	9992.62	8711.12	9351.88	13974.2	11755.1	12842.7	20729.4	20626.9	9603.69	12143.2	20922.2	53049.8	4490.75	7713.88	8307.88	2539.81	2437.94	2629.75
49	16.942	1778.35	Ribonic acid, penta TMS (folic acid or vit B9)	Vitamin	33389.1	36001.1	34695.1	54338.7	52782.9	52805.1	47114.9	30876.5	21002.6	20830.9	27021.2	116198	22650	85996.9	29860.4	87144.5	95777.2	84603.5
50	17.473	1825.63	Mannose, penta TMS	Sugar	9646.69	13265.8	11456.2	13546.9	11309.9	15857.4	2344.25	7363.88	5026.94	5997.06	1438	4127.81	2910.94	8746.12	4968.62	729.625	428.312	496.562
51	17.517	1828.82	Fructose, penta TMS	Sugar	389.375	4450.94	2420.16	7563.25	709.5	31137.9	5019.06	558.5	191.562	321.5	267.625	260.875	917.562	1086.06	2340.06	193.75	423.438	232.562
52	17.576	1835.57	Citric acid, tetra TMS	Organic acid	1473726	1427352	1450539	968475	993408	1158910	1499724	1494805	1034366	1268585	1117309	1988415	829319	1545455	818353	226510	212004	213627
53	17.595	1837.36	Galactofuranose, penta TMS	Sugar	55295.6	49579	52437.3	30368.6	34631.8	57722.7	60304.9	53645.5	33527.9	44568.1	38118.2	81441.1	28827.1	57269.5	26937.4	7374.06	10462.4	8036.5
54	17.604	1840.66	Citric acid, tetra TMS isomer	Organic acid	1473418	1427243	1.45033e+06	65313.1	992998	247602	1499764	1494599	1035886	1268633	1118216	1989704	25408.2	1544801	20748.2	226989	6204	6274.94
55	17.706	1847.86	Myristic acid, TMS ester	Fatty acid	8939.06	8781.56	8860.31	4354.31	3033.88	4674.81	6167.81	3105.12	2074.12	1897.25	4519.94	12555.4	1523.94	3192.62	2225.75	2237.56	1915.06	1551.69
56	17.721	1848.94	1,5-Anhydro-sorbitol, tetra TMS ether	Sugar alcohol	84527.8	84051.4	84289.6	25290.6	24098.8	29626.2	17837.1	99227.6	59874.8	68296.8	12938	33773.5	9277.62	32634.9	15230.4	7958.5	6582.69	6527.94
57	17.798	1856.44	2-deoxy-galactopyranose, tetra TMS	Sugar	39926.9	40190.4	40058.7	15228.6	14746.4	17748.6	4566.88	32661.8	19608.6	23040.5	2919.31	11470.9	54731.8	172404	76644.1	3963.38	5735.81	4770.75
58	18.053	1880.49	Galactopyranose, penta TMS ether	Sugar	34340.1	39218.9	36779.5	23769.8	24794.8	32315.6	69188.8	33902.8	24093.6	28780.3	52945.1	152826	21327.4	62120	27833.7	66474.2	75307.4	65665.2
59	18.416	1914.62	Mannose, penta TMS	Sugar	103313	99564.2	101439	141091	95474.3	314566	55616.5	28950.6	18778.5	24057.8	28506.7	110850	26250.8	41179.9	22216.9	41362.9	59623.2	49828.4
60	18.533	1925.64	Talopyranose, penta TMS ether	Sugar	99417.6	81473.2	90445.4	70702.5	73439.1	77602.1	167016	80726.6	53368.9	60187.4	107168	338985	48634.5	129387	58072.8	136415	152326	135014
61	18.747	1945.73	n-Pentadecanoic acid TMS ester	Fatty acid	1528.94	1611.25	1570.09	1337.56	649.75	965.25	1405.5	902.562	572.875	477.312	1000.19	2634.31	571.312	848.562	661	678.312	446.75	548.188
62	18.861	1956.66	1-hexadecanol-O-TMS	Alcohol	768.5	1578	1173.25	212.75	706.375	990.75	868.812	1387.12	190.688	395.5	431.875	1519.12	247.562	1518.38	1614.38	865	1072.25	328
63	18.91	1960.51	Mannitol, hexa-TMS	Sugar alcohol	2921.81	2867.06	2894.44	2235.31	2557.12	2747.69	1149.44	9827.5	1370.19	1625.25	1170.38	11617.5	6804.06	17986.5	8689.75	9964.94	10731.7	9753.88
64	19	1969.52	Ascorbic acid, tetra TMS (vitamin C)	Vitamin	5962.31	3786.31	4874.31	11500	11168.5	14597	2071.31	2204.81	2253.88	1641.12	2230.06	5329.44	6746.81	8470.44	672.188	16775.4	19407.5	17581.9
65	19.139	1982.73	Mannonic acid, 1,5-lactone, tetra TMS	Sugar acid	780.375	857.062	818.719	758.75	849.5	1031.44	715.312	987.625	561.75	582.812	633.125	1660.75	610.812	1814.38	948.938	517.875	763.625	688.875
66	19.238	1991.95	Glucuronic acid, penta TMS	Sugar acid	1213.38	1575.19	1394.28	1684.62	2218	1760	1180.62	2949.69	2123.19	1972	997.562	2880.75	973.562	4391.12	2505.19	1048	1616.62	1445.38
67	19.314	1999.08	D-Glucopyranose, TMS	Sugar	118734	127090	122912	143743	95230.2	352322	63300.8	34175.9	19305.1	32597.3	36875.4	124646	24334.9	34532.7	23897.9	63939.1	76961.6	63378
68	19.528	2020.73	Galacto furanoside, ethyl 2,3,5,6-tetra-O-TMS	Sugar	439.438	1660.31	1049.88	279.5	224.688	704	233.812	440.125	417.125	287.062	865.812	878.438	160.375	216.875	300	534.062	410.188	391.875
69	19.585	2026.99	Gluconic acid, hexa TMS	Sugar	29081.2	30806.9	29944.1	8507	7990.94	10043.2	5044	12162.4	8360.56	9325.5	3337.69	9516.5	13277.3	36612.4	17928.9	72519.8	76903.8	69221.4
70	19.747	2043.75	Palmitic acid, TMS	Fatty acid	116555	104545	110550	91050.6	46850.6	109659	113568	275643	63454.1	35034.9	93551.1	177868	42903.1	71547.8	56683.7	55582.5	78006.6	33288
71	20.299	2100.62	N-acetyl-D-glucosamine, tetra TMS ether	Amino acid/nitrogenous	2202.44	3739.75	2971.09	3092	2207.12	4494	15762.6	5621.69	3727.94	4277.56	14093.2	45707.9	2225	7252.06	3890.75	983.812	1562.62	1237.88
72	20.463	2117.67	Myoinositol, hexa TMS	Sugar alcohol	108085	99705.5	103895	242397	259882	284981	108691	74132.1	47533.6	55715.1	69053.4	205893	175080	415037	193171	308249	324557	289064
73	20.727	2144.98	Margaric acid, TMS ester or heptadecanoic acid	Fatty acid	1310.19	239.25	774.719	1222	854.562	378.625	132.5	1156.62	971.062	645.875	1061.38	2320.69	676.812	1133.94	969	720.688	906.125	751.062
74	21.132	2186.84	L-Norvaline, N-(2-methoxyethoxycarbonyl)-, heptyl ester	Amino acid/nitrogenous	781.75	1306.12	1043.94	940.562	588.875	1103.25	318.188	859.688	569.125	412.188	844.25	1518.19	194.062	496.625	319.938	225.062	289.062	372.438
75	21.406	2216.22	Oleic acid, TMS ester	Fatty acid	44876.9	39155.9	42016.4	23102.2	15932.1	21307.2	32572.8	20125.9	8968.62	8905.38	21632.9	58443.9	12354.9	29353.2	17111.5	48879.9	15687.2	16762.3
76	21.621	2240.49	Stearic acid, TMS ester	Fatty acid	75082.6	80826.1	77954.3	66019.6	45626.4	83856.4	78990.6	256561	52259.4	38932.7	74008.8	127616	42863.9	64944.6	58465.8	57958	61446.9	40230.4
77	23.003	2395.94	Myristic acid, 2,3-di-TMS-propyl ester	Fatty acid	3442.12	2921.81	3181.97	1252.81	1027.56	368.5	845.75	1180.44	425.312	261.75	590.812	1381.31	472.875	319.25	198.875	597.25	407.812	421.062
78	24.594	2597.07	1-Monopalmitin TMS ether	Monoacylglycerol	15548	29339.5	22443.8	10901.6	8274.12	11108.1	10786.6	37036.9	5580.81	6285.81	8373.44	14028.1	4534.75	12362.7	9972.06	8735	6841.25	7450.94
79	25.085	2661.28	Maltose, octa-TMS ether	Sugar	1678.19	2155.62	1916.91	682.562	384.812	1651.25	758.812	1988.38	456.938	587.125	688.438	1424.94	1064.81	2560.75	1415.5	575.625	961.312	1008.44
80	25.352	2691.23	D-Lactose, octa TMS ether	Sugar	5283386	5115602	5199494	5741055	5427739	5674777	5402214	5547496	5667116	5336332	5052171	5672275	5348916	5311722	5417680	4842006	4830081	4687684
81	26.065	2783.27	Stearic acid, 2,3-di TMS propyl ester	Fatty acid	14803	31328.2	23065.6	13483.1	15645.3	14945.2	15554.9	41547.2	9228.88	11469.2	9190	18402.1	7952	23333.1	13573.3	16282.7	9208.62	10710.7
82	26.185	2798.56	Unknown sugar	Sugar	310611	288512	299561	299249	312055	305843	312967	295047	294265	299791	279571	300204	322664	307819	302677	309438	296908	289512
83	26.186	2798.66	Unknown fatty acid	Fatty acid	1548240	1455085	1.50166e+06	1516783	1571422	1501311	1553521	1482189	1482646	1496163	1464812	1429442	1630316	1525548	1476454	1448932	1454048	1491157
84	26.229	2802.81	D-Lactose, octa TMS ether	Sugar	2855483	3616924	3.2362e+06	2657009	2640977	3791414	2928749	3506650	3341197	3481546	3536256	3641268	2702108	3728610	3528854	3520319	3506258	3496307
85	27.044	2876.18	3-α-Mannobiose, octa-TMS ether	Sugar	4410	5114.62	4762.31	4433.38	4519.06	5119.19	3940.12	4809.38	4459.31	4326.88	4222.31	6523.25	2711.69	4215.5	4793.56	3319.38	4388.31	4316.81
86	27.721	2937.3	Galactinol, nona TMS ether	Sugar	9895.38	11135.2	10515.3	22628.9	20377.2	25754.6	10193	11339.6	7614.62	7395.31	8384.38	24401.4	10991.5	57606.8	26957.1	54301.2	88231.2	81525.5
87	29.208	3071.21	Cholesterol, TMS	Sterol	15448	39373.6	27410.8	13993.4	8639.44	23050.4	15397.7	422467	10793.1	8395.81	24206.2	20891.9	6258.38	20078.7	13144.4	10891.2	19607.9	8164.62
				Total	1.54033e+07	1.6893e+07	1.61482e+07	1.39371e+07	1.44809e+07	1.65938e+07	1.52507e+07	1.72763e+07	1.46245e+07	1.4407e+07	1.47075e+07	2.02175e+07	1.20259e+07	1.72561e+07	1.34415e+07	1.27034e+07	1.29252e+07	1.24796e+07
